# Supplementary material for: DNA-conjugated gold nanoparticles based colorimetric assay to assess helicase activity: a novel route to screen potential helicase inhibitors
Source: PubMed Central journal article supplement (PMC5347027; doi:10.1038/srep44358), 2017-03-13
Supplement: srep44358-s1.pdf [file srep44358-s1.pdf]

# DNA-conjugated gold nanoparticles based colorimetric assay to assess helicase activity: a novel route to screen potential helicase inhibitors

Jashmini Deka<sup>1#</sup>, Aditya Mojumdar<sup>2#</sup>, Pietro Parisse<sup>1</sup>, Silvia Onesti<sup>2\*</sup> and Loredana Casalis<sup>1\*</sup>

## Supplementary Information

### Supplementary Figure S1

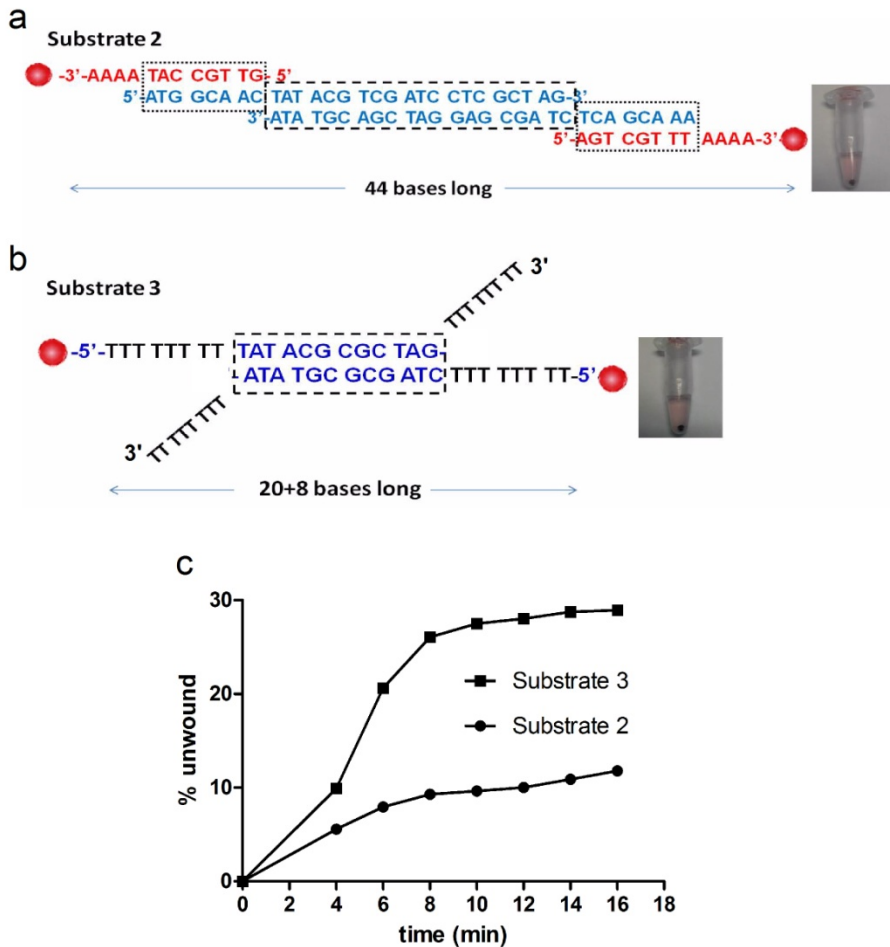

**Supplementary Figure S1.** (a) Schematic diagram of a longer blunt-ended duplex (Substrate 2). (b) Schematic diagram of a substrate with a 3' tail (Substrate 3). (c) DNA unwinding activity of the enzyme as a function of time for the two substrates.
